# Supplementary material for: Human Activity Recognition and Location Based on Temporal Analysis
Source: Hindawi journal article supplement (doi:10.1155/2018/4752191), 2018-12-16
Supplement: f1 [file 4752191.f1.zip]

Archive with 15 entries (15 files):
- binary_model.py
- binary_test.py
- binary_train.py
- eval_detection_results.py
- gen_bottom_up_proposals.py
- gen_proposal_list.py
- gen_sliding_window_proposals.py
- load_binary_score.py
- requirements.txt
- ssn_dataset.py
- ssn_models.py
- ssn_opts.py
- ssn_test.py
- ssn_train.py
- transforms.py
